# Supplementary material for: Quality Assessment and Validation of High-Throughput Sequencing for Grapevine Virus Diagnostics
Source: MDPI journal article supplement (doi:10.3390/v13061130), 2021-06-11
Supplement: s1 [file s1]

AGVd

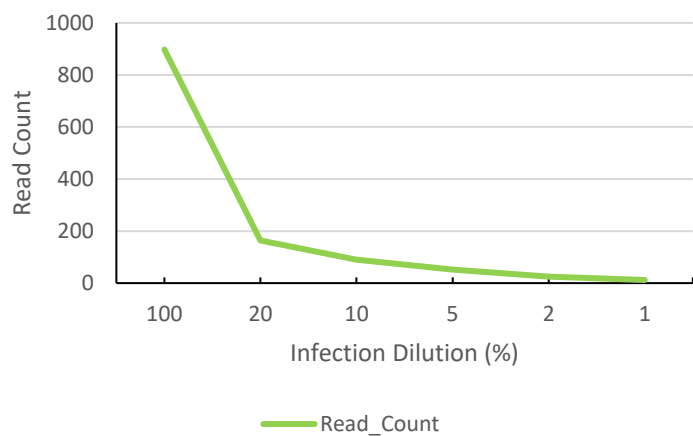

GFkV

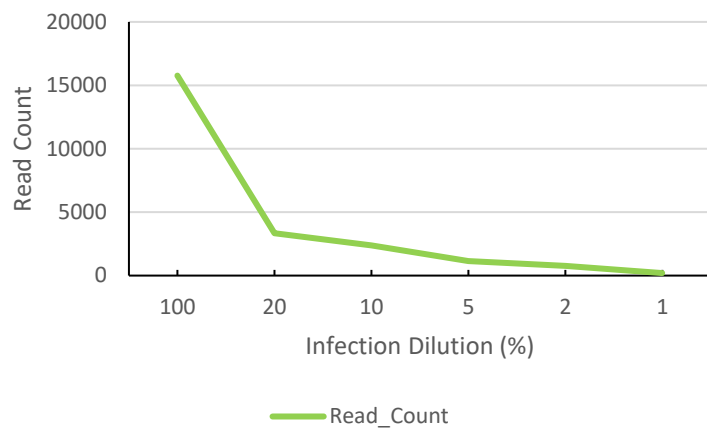

GLRaV-1

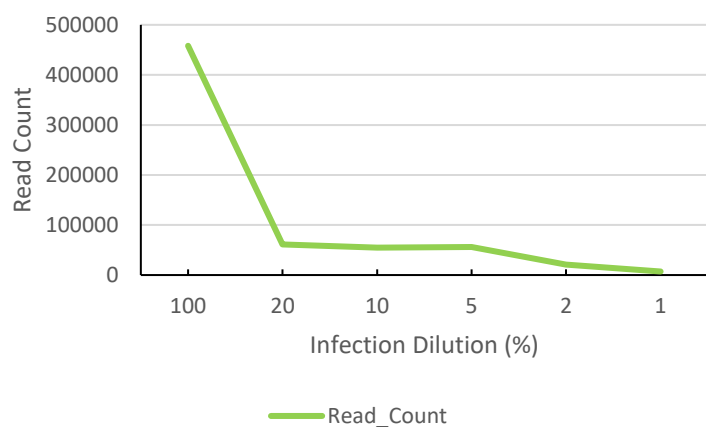

GLRaV-2

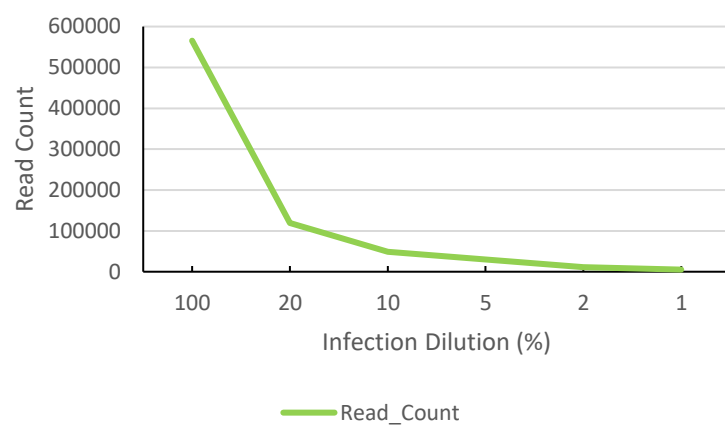

GKSV

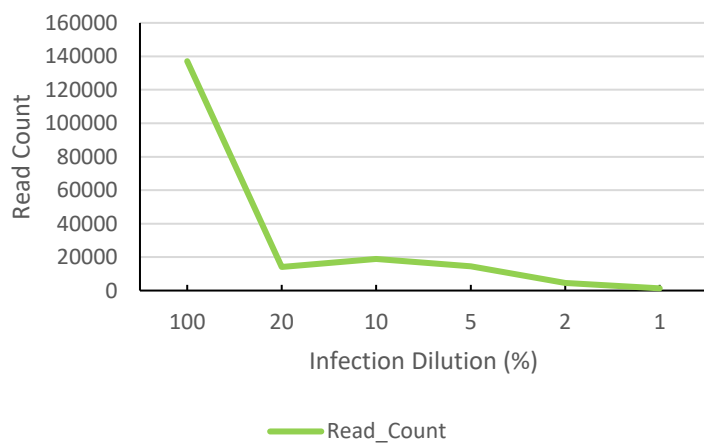

GLRaV-4

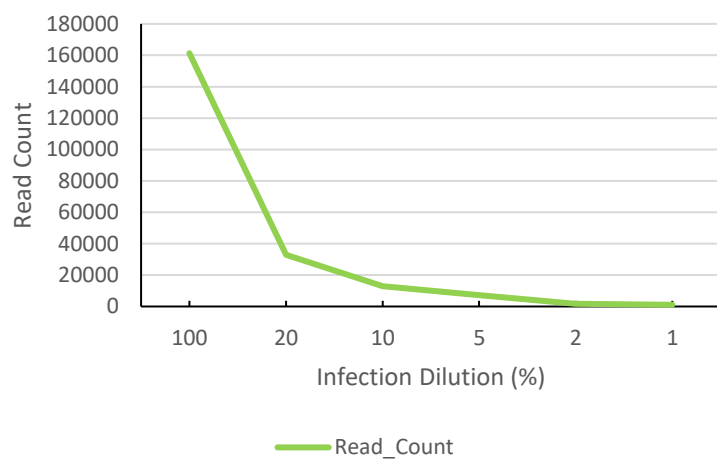

GLRaV-7

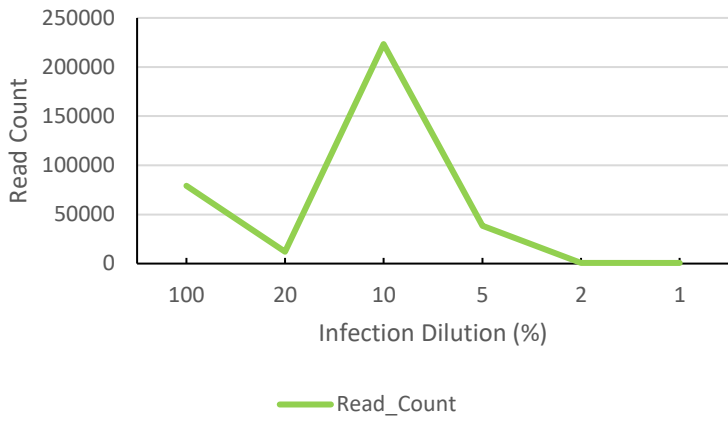

GRBV

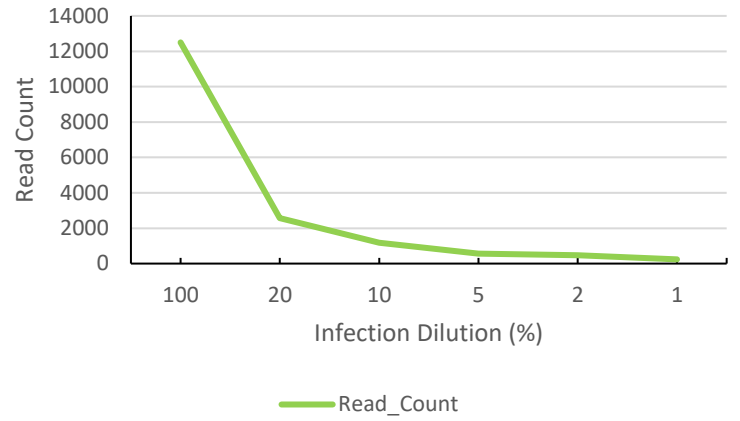

GRSPaV

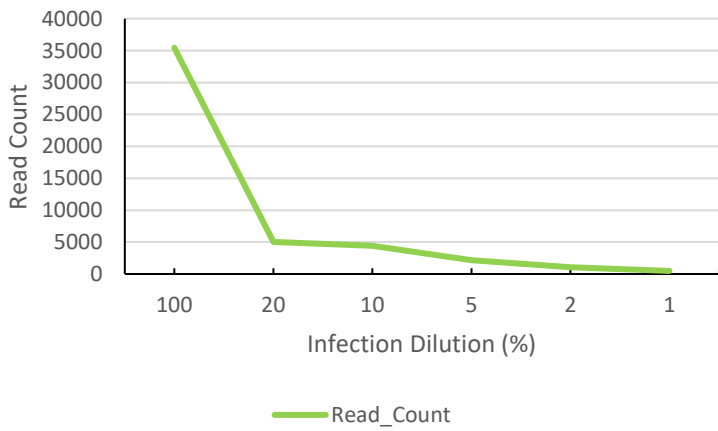

GVA

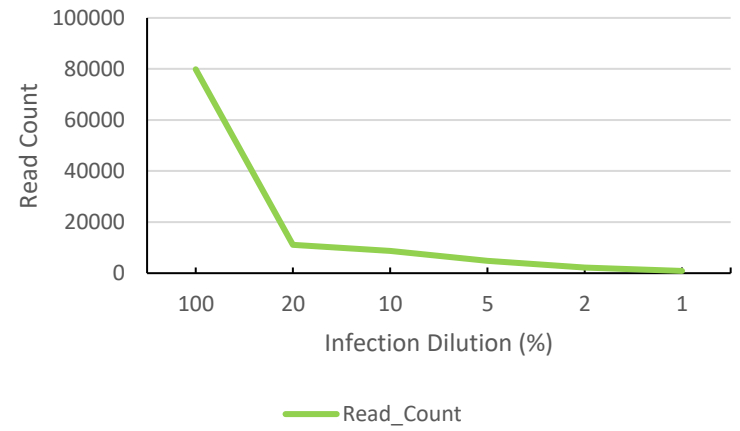

GVB

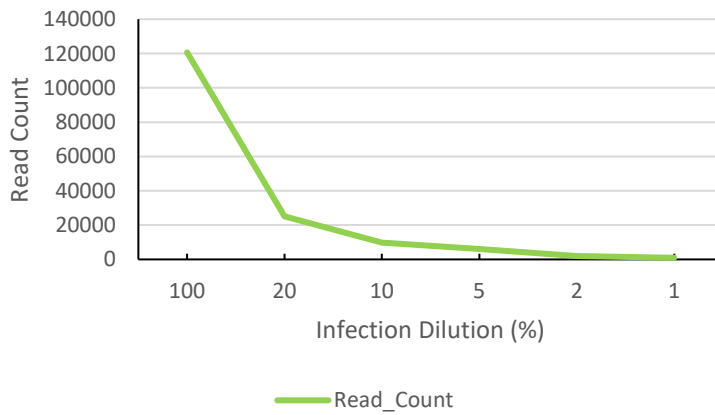

GVD

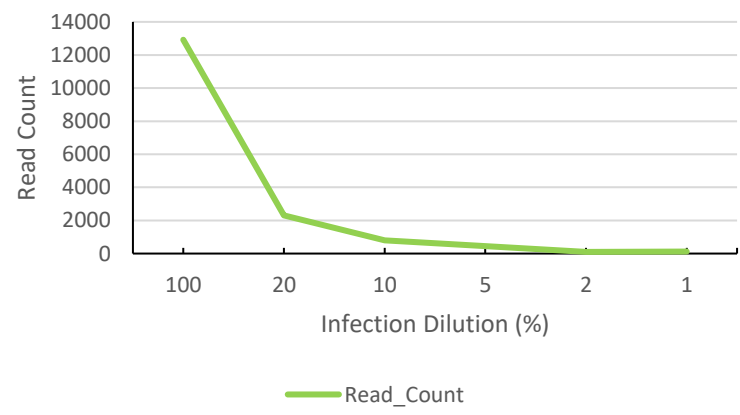

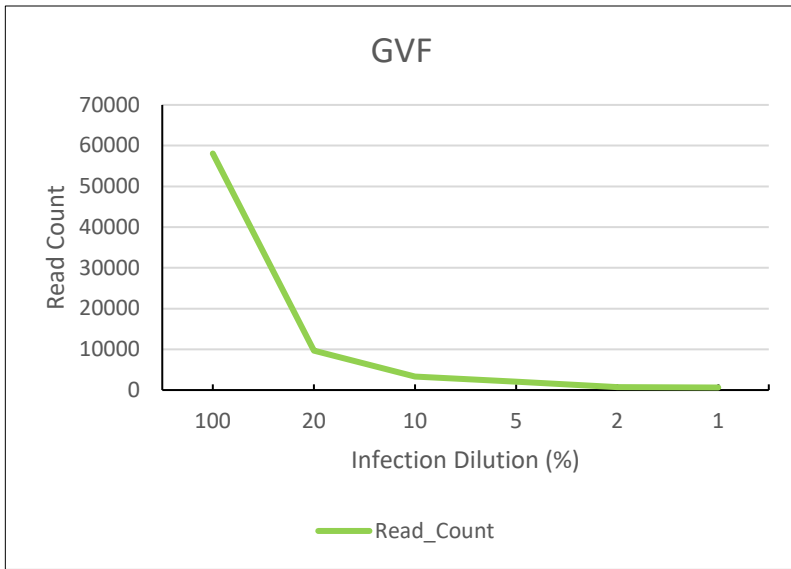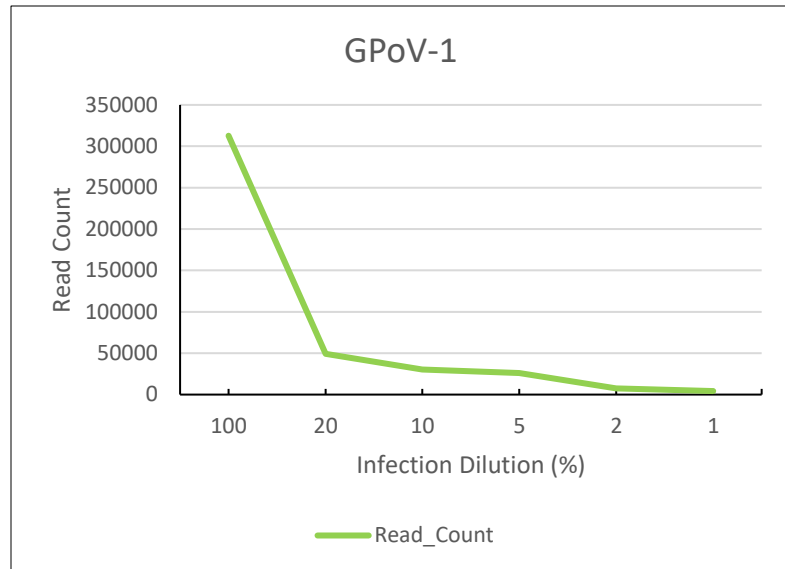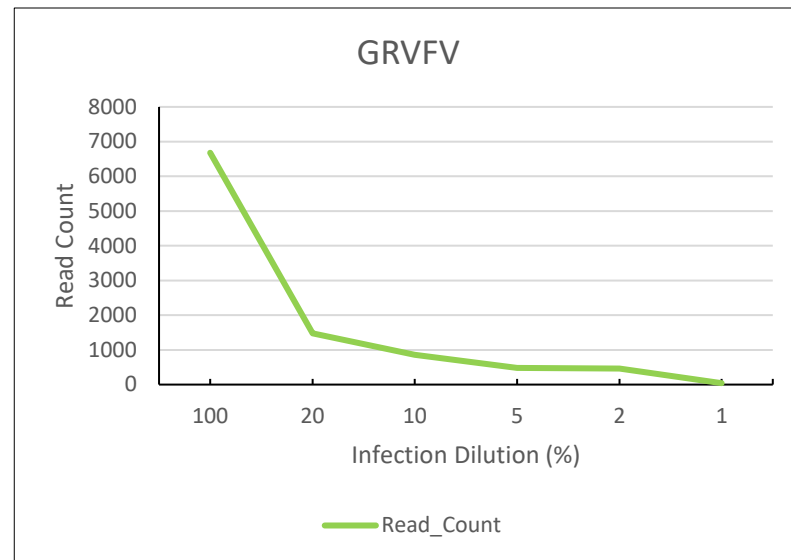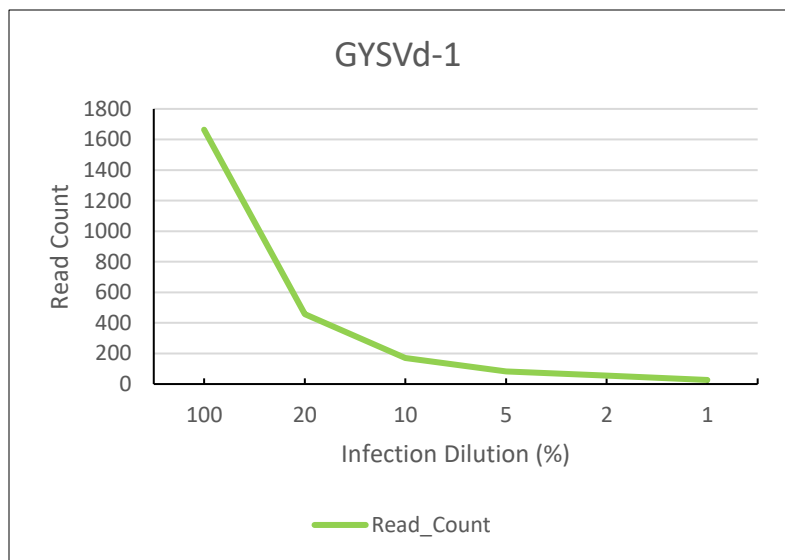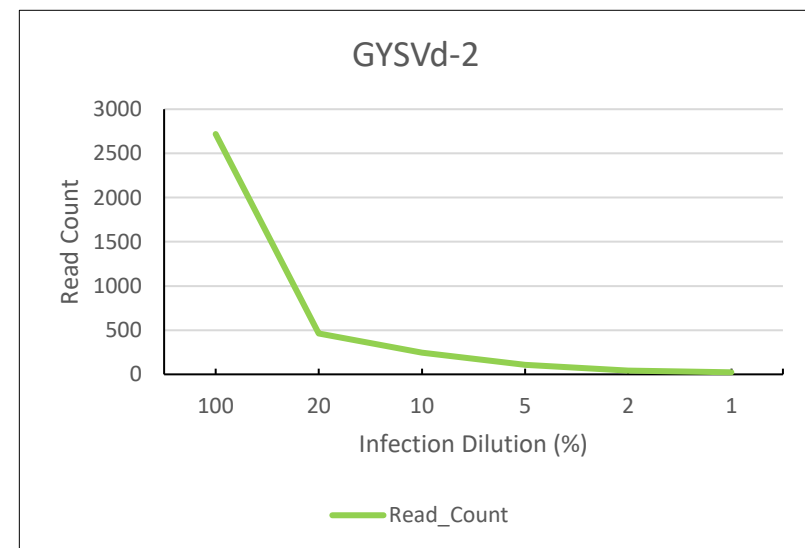

**Fig. S1.** Average read counts for respective viruses and viroids over infection dilutions of grapevine samples sets.
